# Supplementary material for: Assembly and relaxation behaviours of phosphatidylethanolamine monolayers investigated by polarization and frequency resolved SFG-VS
Source: Royal Society of Chemistry journal article supplement (doi:10.1039/c5cp03977k), 2015-01-01
Supplement: c5cp03977k1.pdf [file c5cp03977k1.pdf]

## Supplementary Information

# Assembly and Relaxation Behaviors of Phosphatidylethanolamine Monolayers Investigated by Polarization and Frequency Resolved SFG-VS

*Feng Wei<sup>\*†</sup>, Wei Xiong, Wenhui Li, Wangting Lu, Heather C. Allen, Wanquan Zheng*

### 1. Experimental details of $\pi$ -A isotherm and BAM detections

Three PE lipids: DMPE, D<sub>54</sub>-DMPE and DPPE (Avanti lipids, purity > 99%) were analyzed in this study. The lipid solutions for spreading were prepared using the mixing solute of CHCl<sub>3</sub>: Methanol = 4:1. For each isotherm experiments, about 35  $\mu$ l lipid solution (1 mM) were spread on the surface of deionize water (Milli-Q Academic). The Langmuir isotherm of DMPE and DPPE monolayers were collected by KSV Teflon mini Trough with a compression speed of 5mm/min. The same Langmuir trough was also used in SFG-VS detection to control the SP of monolayer. For SFG spectra collection at stabilized SP value ( $\pm 0.3$  mN/m), the compression speed of  $\pm 3$  mm/min was used. For the compression kinetics detection, the compression speed was 27 mm/min.

BAM images of the monolayers were collected simultaneously with  $\pi$ -A isotherms using a custom-built BAM. The laser source (Research Electro-Optics) emits 5 mW p-polarized light at 543 nm. The incident beam is first attenuated by a half-wave plate and then filtered by a Glan-Thompson polarizer before reaching the aqueous surface at the Brewster angle ( $\sim 53^\circ$ ). The reflected beam is collected by an infinity-corrected Nikon 10 $^\circ$  objective lens and is then focused by a tube lens. A back-illuminated electron multiplying CCD camera (Andor, model DV887-BV, 512  $\times$  512 pixels) was used to record BAM images. The inclined position of the imaging optics

results in images focused along a central narrow stripe. Final images taken were cropped from a  $800\text{ }\mu\text{m} \times 800\text{ }\mu\text{m}$  size to show the most resolved regions, which was typically the center of the image where the beam was the most intense.

## 2. SFG spectra of ODT monolayers

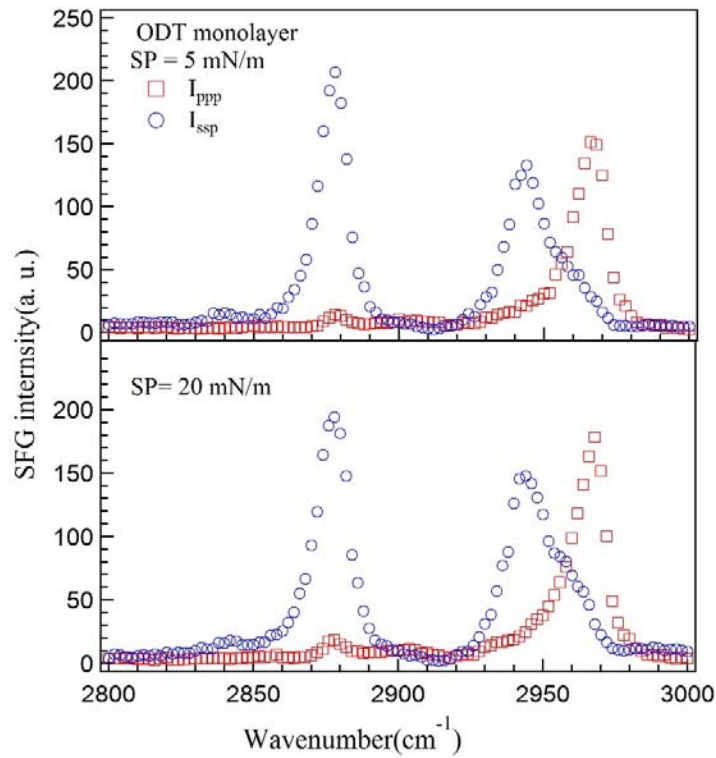

Figure S1. SFG spectra of ODT monolayer at SP = 5 mN/m and 20 mN/m in the wavenumber range of 2800-3000  $\text{cm}^{-1}$ .

## 3. Fitting of SFG-VS Signals

As described in detail elsewhere, the intensity of the SFG light is proportional to the square of the sample's effective second-order nonlinear susceptibility ( $\chi_{\text{eff}}^{(2)}$ ), and the intensity of the two input fields  $I_1(\omega_{\text{vis}})$  and  $I_2(\omega_{\text{IR}})$ , see eq. (S1), which vanishes when a material has inversion symmetry.<sup>1-7</sup>

$$I(\omega_{SFG}) \propto |\chi_{eff}^{(2)}|^2 I_1(\omega_{vis}) I_2(\omega_{IR}) \quad (S1)$$

where  $\omega_{SFG} = \omega_{IR} + \omega_{vis}$ . As the IR beam frequency is tuned over the vibrational resonance of surface/interface molecules, the effective surface nonlinear susceptibility  $\chi_R^{(2)}$  can be enhanced.

The frequency dependence of  $\chi_{eff}^{(2)}$  is described by eq. (S2)

$$\chi_{eff}^{(2)}(\omega) = \chi_{NR}^{(2)} + \sum_v \frac{A_v}{\omega - \omega_v + i\Gamma_v} \quad (S2)$$

where  $A_v$ ,  $\omega_v$ , and  $\Gamma_v$  are the strength, resonant frequency, and damping coefficient of the vibrational mode( $v$ ), respectively.  $A_v$  could be either positive or negative depending on the phase of the vibrational mode. The plot of SFG signal vs. the IR input frequency shows a polarized vibrational spectrum of the molecules at surface or interface.  $A_v$ ,  $\omega_v$ , and  $\Gamma_v$  can be extracted by fitting the spectrum. The fitting parameters of SFG spectra of DMPE monolayer at 3mN/m and 20 mN/m are listed in table S1 for demonstration.

Table S1 Fitting parameters of SFG spectra of DMPE monolayer at 3mN/m and 20 mN/m

| SP<br>Polarization | 3 mN/m          |                    | 20 mN/m           |                   |
|--------------------|-----------------|--------------------|-------------------|-------------------|
|                    | PPP             | SSP                | PPP               | SSP               |
| $A_0$              | $0.65 \pm 0.09$ | $0.54 \pm 0.09$    | $-0.39 \pm 0.07$  | $-0.74 \pm 0.29$  |
| Peak 1             | $A$             | $-32.07 \pm 16.23$ | $10.29 \pm 7.66$  |                   |
|                    | $\omega_0$      | $2837.1 \pm 2.4$   |                   |                   |
|                    | $\Gamma$        | $16.9 \pm 5.8$     |                   |                   |
| Peak 2             | $A$             | $-18.63 \pm 4.87$  | $-33.24 \pm 2.19$ | $14.87 \pm 1.22$  |
|                    | $\omega_0$      | $2855.0 \pm 0.4$   |                   | $13.98 \pm 1.47$  |
|                    | $\Gamma$        | $7.6 \pm 0.4$      |                   | $2848.5 \pm 0.9$  |
| Peak 3             | $A$             | $9.79 \pm 1.51$    | $-38.41 \pm 1.84$ | $-18.92 \pm 2.09$ |
|                    | $\omega_0$      | $2882.1 \pm 0.2$   |                   | $110.93 \pm 2.23$ |
|                    | $\Gamma$        | $4.9 \pm 0.2$      |                   | $2880.8 \pm 0.1$  |
| Peak 4             | $A$             | $-2.69 \pm 1.98$   | $-5.34 \pm 2.45$  | $-24.22 \pm 5.85$ |
|                    | $\omega_0$      | $2930.2 \pm 0.8$   |                   | $31.27 \pm 6.70$  |
|                    |                 |                    |                   | $2901.6 \pm 0.7$  |

|        |            |                   |                   |                   |                   |
|--------|------------|-------------------|-------------------|-------------------|-------------------|
|        | $\Gamma$   | $4.7 \pm 1.8$     | $10.2 \pm 1.7$    |                   |                   |
|        | $A$        | $2.44 \pm 2.04$   | $-53.81 \pm 3.58$ | $-25.10 \pm 2.73$ | $120.95 \pm 3.79$ |
| Peak 5 | $\omega_0$ | $2947.1 \pm 0.4$  |                   | $2943.4 \pm 0.2$  |                   |
|        | $\Gamma$   | $7.8 \pm 0.4$     |                   | $9.0 \pm 0.2$     |                   |
|        | $A$        | $5.50 \pm 1.70$   | $-5.93 \pm 2.33$  | $-18.36 \pm 5.16$ | $7.09 \pm 2.89$   |
| Peak 6 | $\omega_0$ | $2957.8 \pm 0.3$  |                   | $2957.2 \pm 0.4$  |                   |
|        | $\Gamma$   | $3.7 \pm 0.8$     |                   | $5.6 \pm 1.0$     |                   |
|        | $A$        | $-37.50 \pm 1.54$ | $2.87 \pm 1.31$   | $74.23 \pm 1.82$  | $-15.83 \pm 1.91$ |
| Peak 7 | $\omega_0$ | $2970.4 \pm 0.2$  |                   | $2970.1 \pm 0.2$  |                   |
|        | $\Gamma$   | $4.4 \pm 0.2$     |                   | $5.1 \pm 0.1$     |                   |
|        | $C_0$      | $4.67 \pm 0.42$   | $1.25 \pm 0.99$   | $4.89 \pm 1.1$    | $-4.85 \pm 1.21$  |

#### 4. Tilt angle analysis

The molecular orientation information can be obtained by relating SFG susceptibility tensor elements  $\chi_{ijk}(i, j, k = x, y, z)$  to the SFG molecular hyperpolarizability tensor elements

$\beta_{lmn}(l, m, n = a, b, c)$ .<sup>4-6</sup> The components of  $\chi_{eff}^{(2)}$  of ssp, and ppp polarization combinations are given in equations (S5)-(S6) in the lab coordinate system which is defined as the z-axis being along the surface normal and the x-axis being in the incident plane.<sup>4-6</sup>

$$\chi_{eff,ssp}^{(2)} = L_{yy}(\omega_{SF})L_{yy}(\omega_{Vis})L_{zz}(\omega_{IR})\sin\beta_{IR}\chi_{yyz}^{(2)} \quad (S3)$$

$$\begin{aligned} \chi_{eff,ppp}^{(2)} = & -L_{xx}(\omega_{SF})L_{xx}(\omega_{Vis})L_{zz}(\omega_{IR})\cos\beta_{SF}\cos\beta_{Vis}\sin\beta_{IR}\chi_{xxz}^{(2)} \\ & -L_{xx}(\omega_{SF})L_{zz}(\omega_{Vis})L_{xx}(\omega_{IR})\cos\beta_{SF}\sin\beta_{Vis}\cos\beta_{IR}\chi_{xzx}^{(2)} \\ & +L_{zz}(\omega_{SF})L_{xx}(\omega_{Vis})L_{xx}(\omega_{IR})\sin\beta_{SF}\cos\beta_{Vis}\cos\beta_{IR}\chi_{zxx}^{(2)} \\ & +L_{zz}(\omega_{SF})L_{zz}(\omega_{Vis})L_{zz}(\omega_{IR})\sin\beta_{SF}\sin\beta_{Vis}\sin\beta_{IR}\chi_{zzz}^{(2)} \end{aligned} \quad (S4)$$

where  $\beta_{SF}$ ,  $\beta_{Vis}$  and  $\beta_{IR}$  are the angles between the surface normal and the sum frequency beam, the input visible beam, and the input IR beam, respectively.  $L_{ii}$  ( $i = x, y$  or  $z$ ) denotes the Fresnel coefficients. Under current experimental geometry, after considering the Fresnel coefficient constants, eqs.(S5-S6) are then given by

**CH<sub>3</sub> groups:**

$$\chi_{eff,ssp}^{(2)} = 0.249\chi_{yyz}^{(2)} \quad (S5)$$

$$\chi_{eff,ppp}^{(2)} = -0.159\chi_{xxz}^{(2)} + 0.226\chi_{zzz}^{(2)} \quad (S6)$$

**PO<sub>2</sub><sup>-</sup> groups:**

$$\chi_{eff,ssp}^{(2)} = 0.244\chi_{yyz}^{(2)} \quad (S7)$$

$$\chi_{eff,ppp}^{(2)} = -0.156\chi_{xxz}^{(2)} + 0.225\chi_{zzz}^{(2)} \quad (S8)$$

### 3.1. CH<sub>3</sub> groups.

Here we treated CH<sub>3</sub> groups as C<sub>3v</sub> symmetry. The SFG susceptibility tensor elements

$\chi_{ijk}(i, j, k = x, y, z)$  of C<sub>3v</sub> symmetry have following relationships.<sup>4-6</sup>

$$\chi_{xxz,ss}^{(2)} = \chi_{yyz,ss}^{(2)} = \frac{1}{2}N_s\beta_{ccc}[(1+R)\langle\cos\theta\rangle - (1-R)\langle\cos^3\theta\rangle] \quad (S9)$$

$$\chi_{zzz,ss}^{(2)} = N_s\beta_{ccc}[R\langle\cos\theta\rangle + (1-R)\langle\cos^3\theta\rangle] \quad (S10)$$

$$R = \frac{1+r-(1-r)\cos^2\tau}{2(r+(1-r)\cos^2\tau)} \quad (S11)$$

$$\chi_{xxz,as}^{(2)} = \chi_{yyz,as}^{(2)} = -N_sR'\beta_{ccc}(\langle\cos\theta\rangle - \langle\cos^3\theta\rangle) \quad (S11)$$

$$\chi_{zzz,ss}^{(2)} = 2N_sR'\beta_{ccc}[\langle\cos\theta\rangle - \langle\cos^3\theta\rangle] \quad (S12)$$

$$R' = \frac{\beta_{aca}}{\beta_{ccc}} = \frac{-(1-r)\sin^2\tau \frac{G_{as}}{\omega_{as}}}{2(r+(1-r)\cos^2\tau) \frac{G_{ss}}{\omega_{ss}}} \quad (S13)$$

The parameter  $R$  is estimated to be 3.338 when  $r = 0.03$  and  $\tau = 109.5^\circ$ , and the parameter  $R'$  is estimated to be 2.80.<sup>7</sup> By substitution of eqs. (S9)-(S10) in eqs.(S7)-(S8), the deduced susceptibility ratio  $\chi_{ssp,CH_3-ss}^{(2)} / \chi_{ssp,CH_3-as}^{(2)}$  can be plotted as a function of orientation angle ( $\theta$ ) (shown in Figure S2).

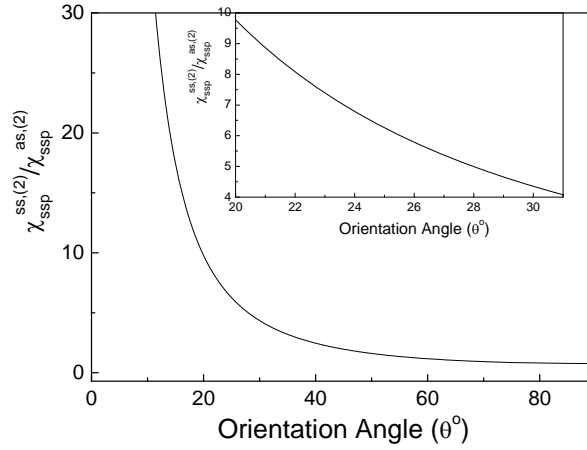

Figure S2 Deduced susceptibility ratio of  $\chi_{ssp,CH_3-ss}^{(2)} / \chi_{ssp,CH_3-as}^{(2)}$  is plotted as a function of orientation angle ( $\theta$ ) for the  $CH_3$  groups which was treated as having  $C_{3v}$  symmetry.

### 3.2. $PO_2^-$ groups.

The symmetry of  $PO_2^-$  group can be treated as  $C_{2v}$  symmetry. The peaks at  $\sim 1100 \text{ cm}^{-1}$  can be assigned to  $A_1$  modes.<sup>8-10</sup> The susceptibility tensor elements of  $A_1$  mode in  $C_{2v}$  symmetry are described as following equations.<sup>4-6</sup>

$A_1$  mode:

$$\begin{aligned} \chi_{xxz}^{(2),A1} = \chi_{yyz}^{(2),A1} = & \frac{1}{2} N_s \beta_{ccc} [\langle \cos^2 \psi \rangle R_a + \langle \sin^2 \psi \rangle R_b + 1] \langle \cos \theta \rangle \\ & + \frac{1}{2} N_s \beta_{ccc} [\langle \sin^2 \psi \rangle R_a + \langle \cos^2 \psi \rangle R_b - 1] \langle \cos^3 \theta \rangle \end{aligned} \quad (S14)$$

$$\begin{aligned} \chi_{zzz}^{(2),A1} = & N_s \beta_{ccc} [\langle \sin^2 \psi \rangle R_a + \langle \cos^2 \psi \rangle R_b] \langle \cos \theta \rangle \\ & - N_s \beta_{ccc} [\langle \sin^2 \psi \rangle R_a + \langle \cos^2 \psi \rangle R_b - 1] \langle \cos^3 \theta \rangle \end{aligned} \quad (S15)$$

where  $\psi$  is the twisting angle of  $PO_2^-$  group. Using the bond polarizability derivative model, the polarization ratios of  $R_a$  and  $R_b$  of  $O \equiv P \equiv O$  stretch in pyridine ring is determined by taking  $r_{P-O} = 0.54$  (corresponding Raman depolarization ratio is 0.33) and  $\tau = 120^\circ$ .<sup>11</sup>

$$R_a = \frac{\beta_{aac}}{\beta_{ccc}} = \frac{1 + r - (1 - r) \cos \tau}{1 + r + (1 - r) \cos \tau} \quad (S16)$$

$$R_b = \frac{\beta_{bbc}}{\beta_{ccc}} = \frac{2r}{1 + r + (1 - r)\cos\tau} \quad (\text{S17})$$

According to eqs.(S16) and (S17), the deduced susceptibility ratio  $\chi_{\text{ppp},\text{PO}_2^- \text{-ss}}^{(2)} / \chi_{\text{ssp},\text{PO}_2^- \text{-ss}}^{(2)}$  at  $\psi = 0^\circ$  can be plotted as a function of the tilt angle (shown in Figure S3).

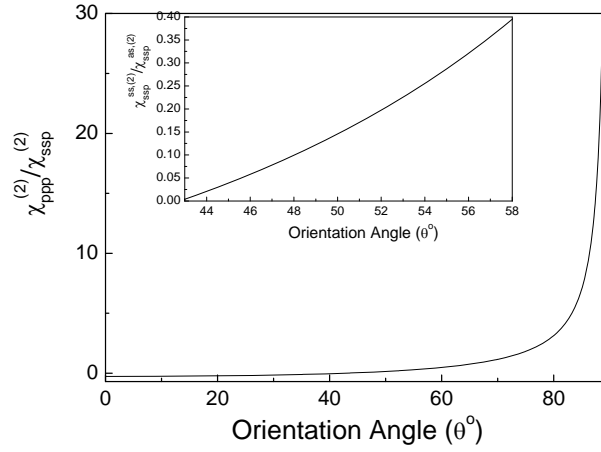

Figure S3 The deduced susceptibility ratio  $\chi_{\text{ppp},\text{PO}_2^- \text{-ss}}^{(2)} / \chi_{\text{ssp},\text{PO}_2^- \text{-ss}}^{(2)}$  is plotted as a function of the tilt angles of  $\text{PO}_2^-$  group treating  $O \equiv P \equiv O$  bond as having  $C_{2v}$  symmetry.

## 5. $R^{1105\text{cm}^{-1}}$ and $R^{2970\text{cm}^{-1}}$ of DMPE and DPPE monolayers

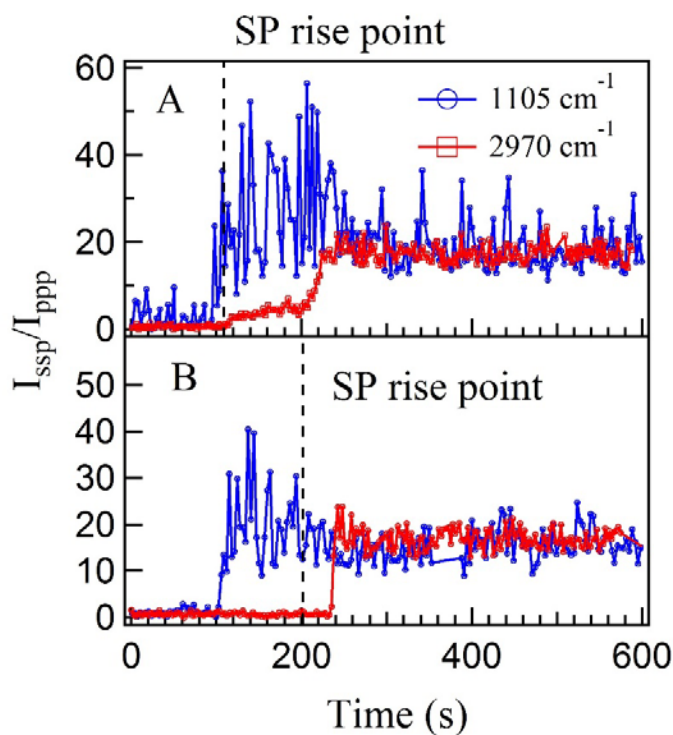

Figure S4.  $R^{1105\text{cm}^{-1}}$  and  $R^{2970\text{cm}^{-1}}$  of A). DMPE and B). DPPE monolayers during the compression

## References

1. Antonov L.; Nedeltcheva, D. *Chem. Soc. Rev.*, **2000**, 29, 217–227.
2. Crisponi, G. *React. Funct.l Polym.*, **1997**, 34, 121-126.
3. Ghasemi, J.; Niazi, A.; Kubista M.; Elbergali, A. *Analyt. Chim. Acta*, **2002**, 455, 335–342.
4. Shen, Y. R. *The Principles of Nonlinear Optics*; John Wiley& Sons: New York, **1984**.
5. Lambert, A. G.; Davies P. B.; Neivandt, D. *J Appl. Spectrosc. Rev.*, **2005**, 40, 103–145.
6. Wang, H. F.; Gan, W.; Lu, R.; Rao, Y.; Wu, B. H. *Int. Rev. Phys. Chem.* **2005**, 24, 191–256.
7. Biswas N.; Umapathy, S.; *J. Chem. Phys.*, **1997**, 107, 7849-7858.
8. Castellucci, E.; Sbrana G.; Verderame, F. D. *J. Chem. Phys.*, **1969**, 51, 3762-3770.
9. Moskovits, M.; DiLella D. P.; Maynard, K. J. *Langmuir*, **1988**, 4, 61-76.



10. Golab, J. T.; Sprague, J. R.; Carron, K. T.; Schatz G. C.; Van Duyne, R. P. *J. Chem. Phys.*, **1988**, 88, 7942-7951.
11. Chen, C. Y.; Liu, W. T.; Pagliusi, P.; Shen, Y. R. *Macromolecules*, **2009**, 42, 2122-2126.
